# Supplementary material
Source: Springer Nature journal article supplement (https://www.springermedizin.de/resource/supplementary/12931_2010_1062_MOESM1_ESM.pdf/9425554)
Supplement: MOESM1 [file 9425554]

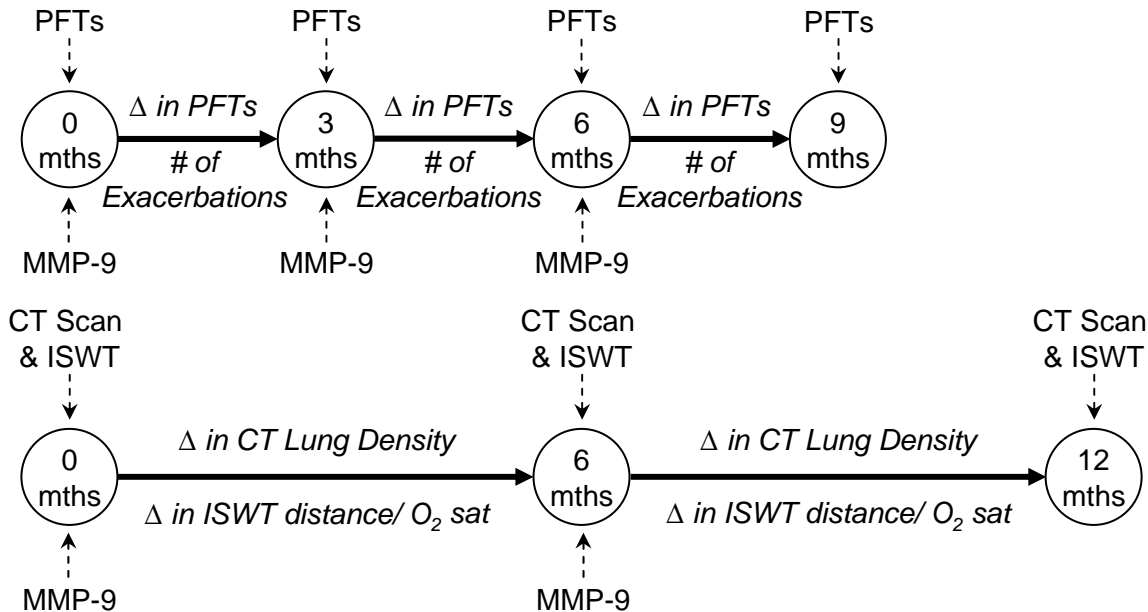

Dashed arrows ( $\uparrow$ ) indicate measurements at indicated times.  
*Italicized text indicates outcome measures.*
